1

2 **Infants are superior in implicit crossmodal learning and use other learning**  
3 **mechanisms than adults**

4

5 Sophie Rohlf <sup>1†</sup>, Boukje Habets <sup>1,2†</sup>, Marco von Frieling <sup>1</sup>, and Brigitte Röder <sup>1</sup>

6

7 1 Biological Psychology and Neuropsychology, University of Hamburg, Hamburg, Germany

8 2 Biological Psychology and Cognitive Neuroscience, University of Bielefeld, Bielefeld, Germany

9 † Equal contribution

10

11

12

13

14

15

16

17

18

19

20

21

22 **Abstract**

23 While adults have to continuously adapt their internal representations of the sensory world, infants  
24 need to first acquire these models. We used event-related potentials to test the hypothesis that infants  
25 extract crossmodal statistics implicitly while adults learn them when task relevant. Six-month-old  
26 infants and adults were passively exposed to frequent standard audio-visual combinations (A1V1,  
27 A2V2,  $p=0.35$  each), rare recombinations of the standard stimuli (A1V2, A2V1,  $p=0.10$  each), and a rare  
28 deviant audio-visual combination with an infrequent auditory and visual element (A3V3,  $p=0.10$ ).  
29 While both infants and adults differentiated between rare deviants and standards at early processing  
30 stages, only infants discriminated standards from recombined stimuli at a later processing stage. A  
31 second experiment revealed that adults discriminated recombined from standard combinations only  
32 when crossmodal combinations were task relevant. These results demonstrate a heightened sensitivity  
33 for crossmodal statistics in infants and a change in learning mode from infancy to adulthood.

34

35

36

37

38

39

40

41

42

43

44

45

46

47

## 48 **Introduction**

49 After birth infants are immediately exposed to a sensory world comprising input of multiple sensory  
50 modalities. The developing brain must adapt to the statistical properties of the sensory environment  
51 (Fiser et al., 2010) since genetically defined neural circuits are usually crude. Indeed a high sensitivity  
52 of infants to statistical regularities within single sensory systems has often been demonstrated (Fantz,  
53 1964; Saffran et al., 1996; Fiser & Aslin, 2002; Bulf et al., 2011). The seminal study of Saffran et al.  
54 (1996) reported that eight-month-old infants quickly learn transitional probabilities between syllables  
55 by pure exposure to an artificial language. This ability was interpreted as a basic mechanism allowing  
56 infants to segment a language. Similar results were found for non-linguistic auditory sequences and  
57 for visual patterns (Fiser & Aslin, 2002), demonstrating a modality independent sensitivity of infants to  
58 statistical patterns in their sensory environment which moreover is not unique to linguistic material.  
59 For example, in the visual domain, there is strong evidence that infants are able to implicitly learn  
60 subtle statistical relationships among visual objects (Fiser & Aslin, 2002; Bulf et al., 2011; Kirkham et  
61 al., 2002). Nine-month-old infants who were exposed to multi element visual scenes, showed greater  
62 interest in element pairs which co-occurred more frequently than in pairs which co-occurred less  
63 frequently. Moreover, the infants were sensitive to the predictability between elements of the pairs  
64 as manifested by the conditional probability relations between these elements (Fiser & Aslin, 2002).  
65 Infants' ability to extract statistical patterns of visual stimuli was found even in younger age groups  
66 (Kirkham et al., 2002); two-, five-, and eight-month-old infants were habituated to sequences of  
67 discrete visual stimuli whose ordering followed a statistical predictable pattern. Subsequently the  
68 infants were shown the previously encountered pattern alternating with a novel pattern of identical  
69 stimulus components. All age groups looked longer at the novel sequences providing evidence for the  
70 detection of visual statistical regularities at an early developmental stage. These results suggest that  
71 infants own powerful mechanisms for extracting the statistical properties of their sensory input  
72 without any instructions, explicit feedback, or intentional awareness (Lany & Saffran, 2013; Krogh et  
73 al., 2013).

74 The ability of infants to detect crossmodal statistical regularities within their sensory environment  
75 is less well understood, but some basic multisensory abilities, such as multisensory temporal synchrony  
76 detection seem to exist within the first month of life (Lewkowicz, 1992). In the next months the  
77 capability to perceive higher-level and more complex multisensory relations starts to develop. For  
78 example, at the age of six months infants were shown to perceive duration-based (Lewkowicz, 1992)  
79 and spatio-temporal based crossmodal relations (Scheier et al., 2001). Furthermore, there is evidence  
80 that similar to adults, infants take advantage of crossmodal events in terms of a better discrimination  
81 and a faster responsiveness to bimodal compared to unimodal information (Bahrack et al., 2004;  
82 Lewkowicz & Kraebel, 2004). First evidence for multisensory facilitation was found in eight-month-old  
83 infants as indicated by faster eye movements to spatially aligned auditory and visual cues compared  
84 to eye movements to each of these stimuli alone (Neal et al., 2006). Moreover, other studies revealed  
85 multisensory benefits for perceptual learning in infants (Bahrack & Lickliter, 2002; Frank et al., 2009).  
86 Five-month-old infants were habituated to either an audio-visual rhythm or the same rhythm  
87 presented unimodally. In the crossmodal condition, infants were able to discriminate between the  
88 familiar and a novel rhythm, whereas no discrimination was observed for the unimodal stimuli (Bahrack  
89 & Lickliter, 2002). Corresponding results were found for the learning of an abstract rule in five-month-  
90 old infants: they were able to learn the sequence if defined by redundant visual shapes and speech  
91 sounds but not if only one sensory modality was involved (Frank et al., 2009). These results suggest  
92 that infants are able to learn and use associations between auditory and visual stimuli. However, it  
93 must be taken into account that the multisensory effects in infants were not tested against statistical  
94 facilitation (probability summation, see Miller, 1982).

95 Several studies on crossmodal association learning have reported that infants at the age of three  
96 months, but not younger, are able to learn specific voice-face pairings; infants were habituated to  
97 different unfamiliar voice-face pairings. In the post-familiarization test the infants showed higher  
98 attention to the learned voice-face pairings as compared to the novel combinations. The latter  
99 category comprised a voice and a face they had heard and seen previously, but the combination of the

100 voice and face was new (Brookes et al., 2001; Bahrack et al., 2005). More recently, near-infrared  
101 spectroscopy (NIRS) and event-related potentials (ERPs) were used to test whether infants are able to  
102 learn crossmodal associations between arbitrary auditory and visual stimuli. Emberson et al. (2011)  
103 used an audio-visual omission paradigm with six-month-old infants and found similar visual cortex  
104 activation for an auditory stimulus as well as visual stimuli that had been previously combined with  
105 this auditory stimulus. The authors interpreted their findings as evidence for top-down mechanisms to  
106 be in place as early as six month of age. Kouider et al. (2015) exposed twelve-month-old infants to  
107 pictures of faces paired with one sound and pictures of flowers paired with another sound. During the  
108 test phase the sound preceded the visual stimulus and was either congruent or incongruent with the  
109 learned combinations (additionally no sound was used in one third of the trials). An enhanced early  
110 negative ERP for congruent visual stimuli as well as an enhanced late positive ERP for incongruent  
111 visual stimuli were found. Both studies demonstrate that infants are able to learn crossmodal  
112 combinations to which they were exposed. However, none of these studies used an adult control  
113 group. Thus, it remains an open question whether developmental and adult crossmodal learning  
114 recruit the same mechanisms. In this context it is interesting to notice that Janacsek et al. (2012)  
115 demonstrated superior implicit statistical learning of visual sequences in young children compared to  
116 older children and adults; a follow-up study indicated that this advantage was lost when they became  
117 more reliant on explicit learning (2013).

118 Based on animal studies it has been proposed (Keuroghlian & Knudsen, 2007) that developmental  
119 and adult plasticity, and thus learning, differ due to different brain states particularly during the  
120 sensitive phase molecular mechanisms dominate that allow for quick and extensive functional and  
121 structural synaptic plasticity (synaptogenesis, synaptic strengthening and elimination) as well as for  
122 the emergence of the functional adaptive connectivity. By contrast, in adulthood these functionally  
123 tuned and to some degree stabilized neural circuits undergo adaptations when relevant to the system.  
124 These age dependent changes from developmental to adult plasticity are impressively demonstrated  
125 by a study on auditory cortex plasticity in rats: while passive exposure to sounds of a specific frequency

126 results in a permanent reorganization of auditory cortex during the sensitive phase, adult rats  
127 reorganize only those aspects of the auditory cortex that are task relevant: for example, rats were  
128 exposed to sounds which varied both in sound frequency and level. When they had to discriminate  
129 them with respect to sound frequency the frequency representation of auditory cortex changed while  
130 the level representation changed when level rather than sound frequency was task relevant (de Villers-  
131 Sidani et al., 2007). These findings suggest that adult learning seems to depend to a larger degree on  
132 attention and context such as task relevance and reward expectations (Keuroghlian & Knudsen, 2007;  
133 Bavelier et al., 2010). This hypothesis was supported by Riedel and Burton (2006) who investigated  
134 whether learning of auditory sequences is influenced by task demands; when using a serial reaction  
135 time task related to the feature of the auditory stimulus, they found learning effects in adult  
136 participants while a passive exposure did not result in learning. Similarly, the statistical relations of  
137 concurrently presented visual streams were only learned by adults for the attended and not for the  
138 unattended streams (Turk-Browne et al., 2005).

139 In the present study we investigated multisensory associative learning in infants and adults to test  
140 the hypothesis that infants show superior crossmodal learning compared to adults when they  
141 encounter crossmodal associations passively. In contrast, adults learn crossmodal associations  
142 predominantly when task relevant. In the first experiment we tested a group of six-month-old infants  
143 (Experiment 1a) and a group of young adults (Experiment 1b). While recording EEG, we presented two  
144 frequently occurring audio-visual standard combinations (A1V1, A2V2,  $p = 0.35$  each, 'Frequent  
145 standard stimuli'), two rare recombinations of the standard stimuli (A1V2, A2V1,  $p = 0.10$  each, 'Rare  
146 recombined stimuli') and one rare audio-visual combination of deviant auditory and deviant visual  
147 stimuli (A3V3,  $p = 0.10$ , 'Rare deviant stimuli'). In a second experiment we tested an additional group  
148 of young adults in adapted versions of the same experiment: participants were not passively exposed  
149 to the stimuli, but had to respond to a target stimulus. In Experiment 2a participants had to detect a  
150 rare unimodal visual stimulus (V4) while the target stimulus in Experiment 2b was one of the rare

151 recombined stimuli (A1V2 or A2V1). Thus, the crossmodal combinations were task relevant in  
152 Experiment 2b but not in Experiment 2a.

153 We predicted that infants would be able to discriminate between the frequent standard and rare  
154 deviant stimuli as well as between frequent standard and rare recombined stimuli, indicated by a  
155 deviant response in the event-related potentials (ERPs). Similar to the infant group we expected a  
156 deviant response to rare deviant stimuli in in all three experiments with adults. In contrast, a  
157 differentiation between standard and rare recombined stimuli was expected to emerge in adults only  
158 in Experiment 2b, that is when crossmodal combinations were task relevant.

159

## 160 **Methods**

### 161 **Experiment 1**

162 In Experiment 1 we investigated a group of infants (Experiment 1a) and a group of young adults  
163 (Experiment 1b) with the same experimental design. Due to the age difference between the groups  
164 adjustments in the procedure and data analyses were necessary. These are described below.

165 **Participants: Experiment 1a.** Sixty-two six-month-old infants (+/- 10 days) took part. Infants were  
166 recruited from the local registration offices. All participating infants were born full-term (38 – 41  
167 weeks), had a typical prenatal and perinatal history and no known neurological or developmental  
168 problems. Parents gave their written consent and were informed about their right to abort the  
169 experiment at any time. They received a small present for their children (toy or picture book) for taking  
170 part. Thirty-three participants were excluded from the analyses because of too many artifacts in the  
171 EEG recordings, leaving a total of twenty-nine data sets for the final statistical analyses (17 female, 12  
172 male). Note that an exclusion rate of approximately 50 % due to artifacts is not uncommon in infant  
173 research (DeBoer et al. 2007). Sample size of Experiment 1a and the following experiments was  
174 selected based on previous studies investigating typical sensory mismatch ERP effects. The study  
175 (including Experiment 1a and 1b) was performed in accordance with the ethical standards laid down

176 in the Declaration of Helsinki in 1964. The procedure was approved by the ethics board of the German  
 177 Psychological Society (DGPs).

178 **Stimuli and Design: Experiment 1a.** The experiment comprised three auditory and three visual stimuli,  
 179 combined into crossmodal pairs of one visual and one auditory stimulus. All three auditory stimuli  
 180 were presented with equal loudness but differed in sound frequency (400, 1000 or 1600 Hz); they were  
 181 presented for 500 ms each via two loudspeakers. The visual stimuli consisted of three geometric  
 182 shapes (circle, triangle, and square; size: 10°) combined with three different colors (green, red, and  
 183 blue) and were presented in the middle of a computer screen for 500 ms.

184 Participants were exposed to two frequently occurring audio-visual standard combinations (A1V1,  
 185 A2V2, each with  $p = 0.35$ , ‘Frequent standard stimuli’) and three infrequently occurring audio-visual  
 186 deviant combinations. The latter consisted of (1) two rare recombinations of the auditory and visual  
 187 stimuli comprising the standard stimuli (A1V2, A2V1, each with  $p = 0.10$ , ‘Rare recombined stimuli’)  
 188 and (2) one rare audio-visual combination of a deviant auditory and a deviant visual stimulus (A3V3,  $p$   
 189  $= 0.10$ , ‘Rare deviant stimuli’), not occurring in the combinations of the frequent standard stimuli and  
 190 the recombined stimuli. The inter stimulus interval between the different crossmodal combinations  
 191 amounted to 1500 ms. The types of crossmodal combinations and stimuli used as ‘Frequent standard  
 192 stimuli’, ‘Rare recombined stimuli’, and ‘Rare deviant stimuli’ were counterbalanced over participants.  
 193 The experiment was divided into five experimental blocks, each comprising 60 trials resulting in a total  
 194 of 300 trials. For each block the proportion of the three conditions was 70: 20: 10 % (see Table 1).  
 195 Thus, even if the experiment was prematurely aborted, each infant received the correct ratio of stimuli.

**Table 1.** Experimental design of Experiment 1a and Experiment 1b.

| Stimuli                                                      | Proportion            | Condition (number of trials)    |
|--------------------------------------------------------------|-----------------------|---------------------------------|
| Auditory 1 – Visual 1 (A1V1)<br>Auditory 2 – Visual 2 (A2V2) | 0.35 }<br>0.35 } 0.70 | Frequent standard stimuli (210) |
| Auditory 1 – Visual 2 (A1V2)<br>Auditory 2 – Visual 1 (A2V1) | 0.10 }<br>0.10 } 0.20 | Rare recombined stimuli (60)    |
| Auditory 3 – Visual 3 (A3V3)                                 | 0.10 } 0.10           | Rare deviant stimuli (30)       |



196 **Procedure: Experiment 1a.** Experiment 1a took place in a sound-attenuated and electrically shielded  
197 room. During the experiment, the infants sat on their parents' laps. The computer screen, displaying  
198 the visual stimuli, was positioned on a table at a distance of approximately 60 cm from the participants.  
199 Infants' heads were aligned with the center of the screen. The two loud speakers were positioned  
200 behind the computer screen.

201 To make sure that the infants attentively observed the stimuli, a black and white video was  
202 continuously played in the background. This video consisted of 30 different sequences of centrally  
203 moving patterns, e.g. randomly moving stars or flying balloons focusing the viewing direction to the  
204 center of the computer screen. All sequences were ten seconds long and were presented without  
205 intermediate breaks. To control whether the infants were actually looking at the computer screen  
206 when the experimental visual stimuli were presented, a small camera, placed on top of the computer  
207 screen, recorded the infants' heads. The camera was connected to the EEG recording computer to  
208 enable a continuous control of the child's attention as well as the EEG signal during the course of the  
209 experiment. If the infant did not look at the screen during the presentation of the stimuli, a marker  
210 was manually inserted by the experimenter in the EEG data file and the associated EEG segments were  
211 later taken out of the analysis. To avoid interfering signals, parents were instructed not to talk to their  
212 children during the time the EEG was recorded. Whenever the infant showed signs of discomfort or  
213 restlessness, the experiment was paused. Occasionally, a hand puppet was used during such breaks to  
214 keep the infants alert and to make sure that they attended to the computer screen when the  
215 experiment was continued. The EEG recording only continued if both the child and the parent were  
216 content. The testing time for all infants ranged between five and ten minutes ( $M = 7.2$  minutes,  $SD =$   
217  $1.6$ ). Together with the preparation time, the infants and their parents spent approximately forty-five  
218 minutes in the laboratory.

219 **Electrophysiological recording and data analyses: Experiment 1a.** EEG data were collected from 45  
220 scalp sites using active Ag/AgCl electrodes (Brain Products, Easycap GmbH, Herrsching) mounted in an  
221 elastic cap (Electro Cap International, Inc.). The electrodes were placed according to the international

222 10-10 system (see Figure 1). EEG Data were recorded continuously using a band-pass filter of 0.01-250  
223 with a sampling rate of 500 Hz (Brain Products, Munich, Germany). The electrode FPz served as online  
224 reference electrode and the ground electrode was applied at AF3. Data were re-referenced offline to  
225 the average of the recordings of electrodes TP9 and TP10, which are located close to the mastoids.  
226 Artifacts were rejected manually after visual inspection of each individual EEG trial. Trials with artifacts  
227 such as head movements, eye blinks, eye movements or electrical noises were removed from further  
228 analyses. The first 15 trials of each dataset were excluded since the participants were not yet  
229 familiarized with the relative proportions of each stimulus condition. Noisy channels were interpolated  
230 by calculating the average of the four adjacent electrodes (Picton et al., 2000). On average, three  
231 electrodes were interpolated for each participant. EEG data sets of infants (n=21) comprising less than  
232 10 trials per condition were excluded from the final statistical analyses (see participants Experiment  
233 1a).

234 For the statistical analyses, the lateral electrodes were grouped into four clusters for each  
235 hemisphere; each cluster comprised four electrodes (see Figure 1): the left hemisphere: (1) Frontal  
236 (F): F9, F7, F3, FC1; (2) Fronto-central (FC): FT9, FT7, FC5, C3; (3) Central-parietal (CP): T7, C5, TP7, CP5;  
237 (4) Parietal-occipital (PO): P3, P7, PO9, O1 and the right hemisphere: (1) Frontal (F): F10, F8, F4, FC2;  
238 (2) Fronto-central (FC): FT10, FT8, FC6, C4; (3) Central-parietal (CP): T8, C6, TP8, CP6; (4) Parietal-  
239 occipital (PO): P4, P8, PO10, O2. The midline electrodes AFz, Fz, FCz, Cz, Pz, and POz were separately  
240 analyzed. EEG data were segmented into epochs from 100 ms pre-stimulus to 1100 ms post-stimulus  
241 onset. Epochs were baseline corrected by means of the 100 ms pre-stimulus interval. The following  
242 two time windows were chosen based on a visual inspection of the group average ERPs: (1) 200 - 420  
243 ms and (2) 420 - 1000 ms. To evaluate differences between conditions, a repeated measurement  
244 ANOVA comprising the within subject factors *Condition* (three levels: 'Frequent standard stimuli' vs.  
245 'Rare recombined stimuli' vs. 'Rare deviant stimuli'), *Hemisphere* (two levels: left vs. right) and *Cluster*  
246 (four levels: F vs. FC vs. CP vs. PO) was calculated separately for each of the two time windows.

247 Significant interactions including the factor *Condition* were followed up with sub-ANOVAs,  
248 calculated separately for each cluster. Significant main effects of *Condition* or interactions of *Condition*  
249 and *Hemisphere* were further analyzed with paired t-tests: 1) 'Frequent standard stimuli' vs. 'Rare  
250 deviant stimuli' and 2) 'Frequent standard stimuli' vs. 'Rare recombined stimuli'. The midline  
251 electrodes were separately analyzed with an ANOVA comprising the factors *Condition* (three levels:  
252 Standard vs. New Combination vs. New Stimuli) and *Electrode* (six levels: AFz vs. Fz vs. Cz. vs. Pz vs.  
253 POz). Similar to the cluster analysis, significant interactions between the factor *Condition* and *Electrode*  
254 were further analyzed by calculating sub ANOVAs and paired t-tests separately for each electrode. The  
255 Huynh-Feldt correction was applied to all analyses comprising within subject factors with more than  
256 two levels. To correct for multiple comparisons, p-values of the t-tests were adjusted with the  
257 Bonferroni-Holm method. Only main effects and interactions, including the factor *Condition*, as well as  
258 significant post hoc tests are reported.

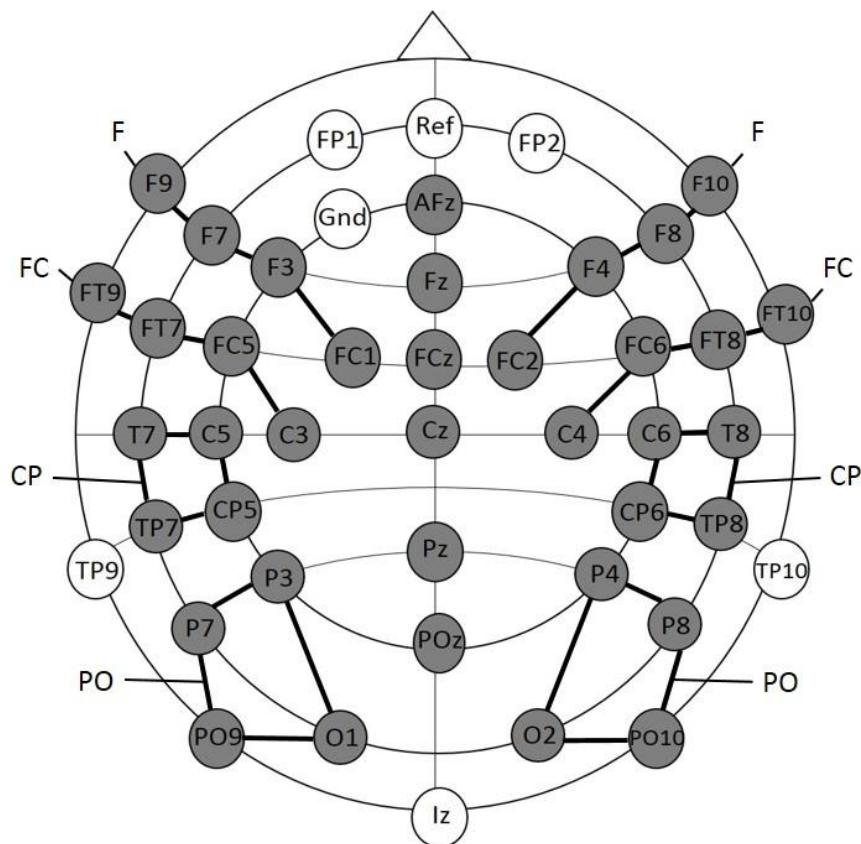

**Figure 1.** Electrode placement for experiment 1a; the grey electrodes were included in the statistical analyses. Clusters are indicated by black connecting lines and were named according to their location along the anterior-posterior axis.

259 **Participants: Experiment 1b.** Twenty-seven young adults recruited from a student-subject database of  
260 the Institute for Psychology (University of Hamburg) were tested. They received either 8 €/ hour or  
261 course-credit. All participants had normal or corrected-to-normal vision, normal hearing and were free  
262 of neurological problems. All participants gave their informed consent. Four participants were  
263 excluded from the analysis due of too many artifacts in the EEG. A total of twenty-three participants  
264 were included in the final analyses (11 male, mean age 23.5 years, range 19-31)

265 **Stimuli and Design: Experiment 1b.** The stimuli and experimental design of Experiment 1b were  
266 identical to Experiment 1a (see Table 1).

267 **Procedure: Experiment 1b.** Experiment 1b took place in the adult EEG lab of the Biological Psychology  
268 and Neuropsychology section of the University of Hamburg. It was constructed by the same company  
269 as the Baby lab and had the same light sources, sound attenuating, and electrical shielding system. The  
270 experimental room was dimly lit and the participants were seated in a comfortable chair in front of a  
271 table. All devices used were the same as for Experiment 1a. The computer screen, displaying the visual  
272 stimuli and background video, was positioned at eye level on a table at a distance of approximately 60  
273 cm from the participants (size of the visual stimuli: 7°). The two loud speakers were located behind the  
274 computer screen. Before the experiment started, participants received written instructions concerning  
275 the procedure of the experiment. In addition, they were asked to sit as still as possible, to limit their  
276 eye blinking during the recording of the experimental blocks and to continuously look at the fixation  
277 point. To control that the participants attended to the computer screen participants' heads were  
278 recorded via a small camera, placed on top of the computer screen, during the experiment.

279 **Electrophysiological recording and data analyses: Experiment 1b.** EEG recording and data analyses  
280 were identical to Experiment 2a and 2b. Note, that the similar results for the ERPs to rare deviants in  
281 infants and adults, including the lateralization, exclude the possibility that differences in analyzing  
282 procedures contributed to the below reported other group differences.

283

284 **Experiment 2**

285 In a second experiment we tested a group of additional young adults in two adapted versions of  
286 Experiment 1 (Experiment 2a and 2b). Experiment 2a and 2b differed in the employed target stimulus  
287 which had to be detected by the participants. The procedure and data analyses were the same for both  
288 experiments.

289 **Participants.** Seventeen healthy university students took part in the experiment. The participants were  
290 recruited from a student-subject database of the Institute of Psychology at the University of Hamburg.  
291 They received either 8 €/ hour or course-credit. All participants had normal or corrected-to-normal  
292 vision, normal hearing and no neurological problems. Five participants were excluded from the analysis  
293 due to too many artifacts in the EEG or insufficient task performance (less than 70 % correct target  
294 detection), leaving a total of twelve participants for the final analyses (four male, age 20 – 31 years,  
295 mean = 23.8 years). All participants gave their informed consent. The study was performed in  
296 accordance with the ethical standards laid down in the Declaration of Helsinki in 1964. The procedure  
297 was approved by the ethics board of the German Psychological Society (DGPs).

298 **Stimuli and design.** The design of Experiment 2 was similar to Experiment 1, but the stimuli and the  
299 experimental setting was adjusted. A visual LED was located inside a small wooden front (22 x 24 cm)  
300 which was covered with a black cloth. The wooden front was placed on top of a black box, to make  
301 sure that the position of the LED was at eye-level at a distance of approximately 85 cm from the  
302 participants. The LED was activated for 100 ms in four possible colors: red, blue, green or yellow.  
303 Auditory stimuli (400, 800, or 1600 Hz) were presented for 100 ms via two speakers which were  
304 positioned adjacent to the wooden front. Crossmodal stimuli were made by combining one of the  
305 sounds with one of the LED colors. Crossmodal combinations were counterbalanced over conditions  
306 and participants. In contrast to Experiment 1b, adults were engaged in a task and had to detect a target  
307 stimulus rather than being passively exposed to a sequence of crossmodal stimuli. The target stimulus  
308 was either unrelated to the crossmodal combinations (Experiment 2a) or addressed specific  
309 crossmodal combinations (Experiment 2b), resulting in two different experiments.

310 In Experiment 2a the frequent standard stimuli (A1V1, A2V2) were presented with a probability of  
 311  $p = 0.30$  each while the rare recombined (A1V2, A2V1) and rare deviant stimuli (A3V3) had a probability  
 312 of  $p = 0.10$  each. An additional unimodal visual stimulus ( $p = 0.10$ , V4) served as target stimulus (see  
 313 Table 2A).

314 In Experiment 2b there was no unimodal V4, but the target stimulus was defined as one of the rare  
 315 recombined stimuli (either A1V2 or A2V1) rendering crossmodal combinations task relevant. A1V1 and  
 316 A2V2 were presented with a probability of  $p = 0.35$  each while the probability for A1V2, A2V1, and  
 317 A3V3 was  $p = 0.10$  each (see Table 2B). All participants took part in both experiments. The order of  
 318 the two experiments as well as the specific audio-visual combinations used for the different conditions  
 319 were counterbalanced over participants. Stimuli were presented in six blocks with 200 trials per block.

**Table 2.** Experimental design of A) Experiment 2a and B) Experiment 2b.

A

| Stimuli                                                      | Proportion            | Condition (number of trials)    |
|--------------------------------------------------------------|-----------------------|---------------------------------|
| Auditory 1 – Visual 1 (A1V1)<br>Auditory 2 – Visual 2 (A2V2) | 0.30 }<br>0.30 } 0.60 | Frequent standard stimuli (720) |
| Auditory 1 – Visual 2 (A1V2)<br>Auditory 2 – Visual 1 (A2V1) | 0.10 }<br>0.10 } 0.20 | Rare recombined stimuli (240)   |
| Auditory 3 – Visual 3 (A3V3)                                 | 0.10 } 0.10           | Rare deviant stimuli (120)      |
| Visual 4 (V4)                                                | 0.10 } 0.10           | Unimodal target Stimuli (120)   |

320

B

| Stimuli                                                      | Proportion            | Condition (number of trials)                           |
|--------------------------------------------------------------|-----------------------|--------------------------------------------------------|
| Auditory 1 – Visual 1 (A1V1)<br>Auditory 2 – Visual 2 (A2V2) | 0.35 }<br>0.35 } 0.70 | Frequent standard stimuli (840)                        |
| Auditory 1 – Visual 2 (A1V2)<br>Auditory 2 – Visual 1 (A2V1) | 0.10 }<br>0.10 } 0.10 | Rare recombined stimuli (120)/<br>Target Stimuli (120) |
| Auditory 3 – Visual 3 (A3V3)                                 | 0.10 } 0.10           | Rare deviant stimuli (120)                             |

321

322

323 **Procedure.** The experiment took place in a dimly lit, sound-attenuating, and electrical shielded room.  
324 The participants were seated in a comfortable chair at a table approximately 85 cm from the box that  
325 contained the visual LED. The target stimulus was presented three times prior to the start of the  
326 experiment, to allow participants to get acquainted with the target. Responses to the target stimuli  
327 were made by means of a custom made button box, placed near the dominant hand. Participants were  
328 instructed to sit as still as possible and to keep their eyes focused on the LED. Experiment 2a and 2b  
329 lasted for twenty to thirty minutes each (including breaks). The total testing time, which included  
330 briefing of the participant, practice trials and EEG application, was approximately 1 hour and 45  
331 minutes for both experiments.

332 **Behavioral analysis.** All button presses within 100 and 1000 ms following stimulus presentation were  
333 considered valid responses. Hit, miss and false alarm rates were calculated and average reaction times  
334 to targets were derived for both Experiment 2a and 2b.

335 **Electrophysiological recording and data analysis.** EEG data were collected from 74 scalp sites using  
336 active Ag/AgCl electrodes (Brain Products, Easycap GmbH, Herrsching) mounted on an elastic cap  
337 (Electro Cap International, Inc.). Data were recorded continuously using a band-pass filter of 0.01-250  
338 with a sampling rate of 500 Hz (Brain Products, Munich, Germany). The electrodes were placed  
339 according to the international 10-10 system (see Figure 2). One additional electrode was positioned  
340 below the left eye to record vertical eye movements. A left earlobe electrode served as online  
341 reference electrode. EEG data were filtered offline with a low-pass filter with a 40 Hz cut-off and were  
342 re-referenced offline to an average reference. Electrodes positioned close to the outer canthi of each  
343 eye (F9 and F10) served for recording horizontal eye movements. An independent component analysis  
344 (ICA) was run for each EEG data set, which defined 30 time-independent components representing the  
345 data (Makeig, Debener, Onton & Delorme, 2004). Components representing artifacts such as eye  
346 blinks, eye movements, electrical noise or heart beat were manually detected and rejected from  
347 further analyses. The first 75 trials (Experiment 2a and 2b) or the first 15 trials (Experiment 1b) of each  
348 dataset were excluded since the participants were not yet familiarized with the relative proportions of



349 each stimulus condition. The lateral electrodes were grouped into six clusters for each hemisphere;  
 350 each cluster comprised five electrodes (see Figure 2): (1) Frontal (F): F1, F3, F5, F7, F9 (2) Fronto-central  
 351 (FC): FC1, FC3, FC5, FT7, FT9 (3) Central (C): C1, C3, C5, T7 (4) Centro-parietal (CP): CP1, CP3, CP5, TP7,  
 352 TP9 (5) Parietal (P): P1, P3, P5, P7, P9 (6) Parieto-occipital (PO): PO3, PO7, PO9, O1, O9) and for the  
 353 right hemisphere: (1) Frontal (F): F2, F4, F6, F8, F10 (2) Fronto-central (FC): FC2, FC4, FC6, FT8, FT10 (3)  
 354 Central(C): C2, C4, C6, T8 (4) Centro-parietal (CP): CP2, CP4, CP6, TP8, TP10 (5) Parietal (P): P2, P4, P6,  
 355 P8, P10 (6) Parieto-occipital (PO): PO4, PO8, PO10, O2, O10). The midline electrodes Fz, FCz, Cz, CPz,  
 356 Pz, POz, and Oz were separately analyzed. EEG data were segmented into epochs starting 100 ms  
 357 before the stimulus onset and lasting for 1000 ms post stimulus onset. Epochs were baseline corrected  
 358 with a pre-stimulus interval of 100 ms. The following time epochs were chosen based on visual  
 359 inspection of the group mean average: Experiment 2a: (1) 80 - 190 ms and (2) 250 - 850 ms; Experiment  
 360 2b (1) 80 – 160 ms, (2) 170 – 230 ms and (3) 250 – 850 ms. The statistical analyses were the same as  
 361 described for Experiment 1a.

362

364

365

366

367

368

369

370

371

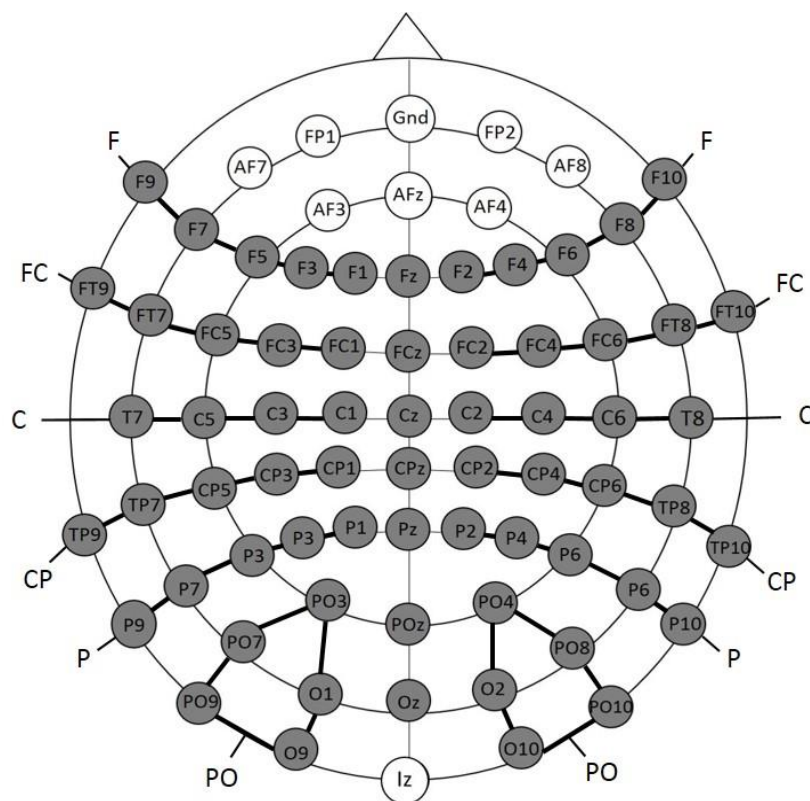

**Figure 2.** Electrode placement for Experiment 2a and 2b; the grey electrodes were included in the statistical analyses. Clusters are indicated by black connecting lines and were named according to their location along the anterior-posterior axis.



## 372 Results

### 373 Experiment 1a (Infants)

374 Rare deviant stimuli (A3V3) elicited a more negative going ERP than audio-visual standard stimuli  
375 (A1V2, A2V2) (see Figure 3). This effect (200-420 ms, 420-1000 ms) was predominantly observed over  
376 the right hemisphere. Crucially, rare recombined stimuli (A1V2, A2V2) elicited a more positive going  
377 ERP compared to frequent standards (see Figure 3), predominantly over the left hemisphere (420 –  
378 1000 ms).

379 **First time window (200 – 420 ms): cluster analysis.** The overall ANOVA with factors *Condition*,  
380 *Hemisphere*, and *Cluster* revealed a significant interaction between the factors *Condition* and  
381 *Hemisphere* ( $F(2,56) = 4.55$ ;  $P = 0.015$ ) as well as a significant interaction of *Condition* × *Cluster* ( $F(6,168)$   
382  $= 4.94$ ;  $P < 0.001$ ). Follow-up ANOVAs revealed a significant interaction of *Condition* × *Hemisphere* for  
383 cluster F ( $F(2,56) = 3.78$ ;  $P = 0.028$ ), FC ( $F(2,56) = 3.67$ ;  $P = 0.029$ ), and cluster CP ( $F(2,56) = 3.18$ ;  $P =$   
384  $0.048$ ). Post hoc t-tests showed that this interaction was driven by a more positive amplitude in  
385 response to rare deviant stimuli compared to standard stimuli (see Figure 3) at cluster F ( $t(28) = 3.18$ ;  
386  $P = 0.014$ ), cluster FC ( $t(28) = 2.93$ ;  $P = 0.026$ ), and cluster CP ( $t(28) = 3.02$ ;  $P = 0.02$ ) of the right  
387 hemisphere.

388 **First time window (200 – 420 ms): midline analysis.** The overall ANOVA with factors *Condition* and  
389 *Electrode* showed a significant interaction between *Condition* × *Electrode* ( $F(10,280) = 2.76$ ;  $P = 0.002$ ).  
390 Follow-up ANOVAs revealed a significant main effect of the factor *Condition* for electrode Fz ( $F(2,56) =$   
391  $5.3$ ;  $P = 0.007$ ) and FCz ( $F(2,56) = 3.79$ ;  $P = 0.02$ ). Post hoc t-tests showed significant differences  
392 between the rare deviant and standard condition at electrode FC ( $t(28) = 2.5$ ;  $P = 0.036$ ) and FCz ( $t(28)$   
393  $= 2.45$ ;  $P = 0.04$ ); rare deviant stimuli elicited a more positive going ERP than standard stimuli (see  
394 Figure 3).

395 **Second time window (420 – 1000 ms): cluster analysis.** The overall ANOVA revealed a significant  
396 interaction of *Condition* × *Hemisphere* ( $F(2,56) = 4.68$ ;  $P = 0.013$ ) as well as a significant interaction of

397 *Condition* × *Cluster* ( $F(6,168) = 4.51$ ;  $P < 0.01$ ). Follow-up ANOVAs showed a significant interaction of  
398 *Condition* × *Hemisphere* at Cluster F ( $F(2,56) = 4.5$ ;  $P = 0.014$ ) and cluster FC ( $F(2,56) = 4.6$ ;  $P = 0.013$ ).  
399 Post-hoc t-tests indicated that ERPs to rare deviant stimuli were significantly more positive than ERPs  
400 to standard stimuli (see Figure 3) at cluster F ( $t(28) = 2.72$ ;  $P = 0.044$ ) of the right hemisphere. In  
401 addition, post hoc t-tests revealed significant differences between standard and rare recombined  
402 stimuli at cluster FC of the left hemisphere ( $t(28) = -2.81$ ;  $P = 0.032$ ), indicating a more negative  
403 amplitude in response to rare recombined stimuli compared to the standard stimuli (see Figure 3).  
404 **Second time window (420 – 1000 ms): midline analysis.** The ANOVA revealed a significant interaction  
405 between the factors *Condition* and *Electrode* ( $F(10,280) = 2.76$ ;  $P = 0.002$ ). Follow-up ANOVAs indicated  
406 a main effect of *Condition* for electrode AFz ( $F(2,56) = 3.4$ ;  $P = 0.04$ ) and Fz ( $F(2,56) = 3.59$ ;  $P = 0.03$ ).  
407 However, none of the subsequent t-tests reached significance (all  $p \geq 0.08$ ).

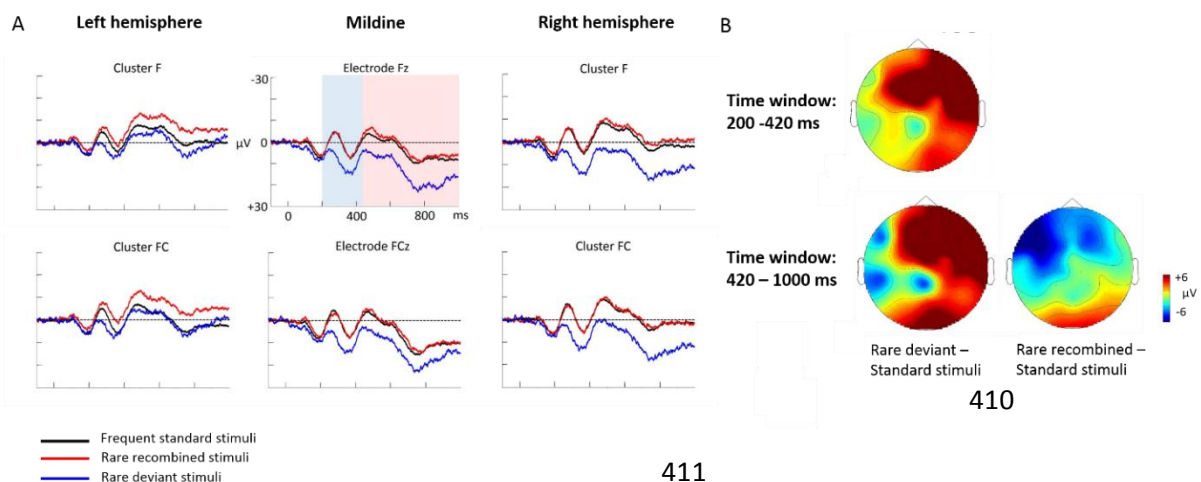

**Figure 3.** Grand average ERPs of Experiment 1a. A) ERPs to the three conditions (frequent standard stimuli, rare recombined stimuli, rare deviant stimuli) are superimposed for the electrode clusters F and FC, and the electrodes Fz and FCz. The analyzed time epochs are marked in blue (200-420 ms) and red (420-1000 ms). B) The topographical distribution of the difference between 'Standard stimuli' - 'Rare deviant stimuli' and 'Standard' - 'Rare recombined stimuli' for the first and second time window.

412

413

414 **Experiment 1b (Adults)**

415 ERPs to rare deviant stimuli were more negative going than ERPs to standard stimuli during both time  
416 windows (180-220 ms, 250 -1000 ms; see Figure 4).

417 **First time window (180 -220 ms): cluster analysis.** The overall ANOVA did not reveal any significant  
418 effect involving the factor *Condition*.

419 **First time window (180 -220 ms): midline analysis.** The overall ANOVA revealed a significant  
420 interaction between the factors *Condition* and *Electrode* ( $F(12,276) = 2.16$ ;  $P = 0.03$ ). Follow-up  
421 ANOVAs revealed a significant main effect of *Condition* for electrode CPz ( $F(2,46) = 4.02$ ;  $P = 0.024$ ).  
422 Post hoc t-tests showed significant differences between the rare deviant and standard stimuli at  
423 electrode Cz ( $t(22) = 2.32$ ;  $P = 0.047$ ); rare deviants elicited a more negative going ERP than standard  
424 stimuli (see Figure 4).

425 **Second time window (250 – 1000 ms): cluster analysis.** The overall ANOVA revealed a significant  
426 interaction between the factors *Condition*, *Hemisphere*, and *Cluster* ( $F(10,230) = 2.49$ ;  $P = 0.007$ ).  
427 Follow-up ANOVAs obtained a significant main effect of *Condition* for cluster FC ( $F(2,46) = 4.56$ ;  $P =$   
428  $0.015$ ). Post hoc t-tests showed that this interaction was driven by a more positive amplitude in  
429 response to rare deviant stimuli compared to standard stimuli (see Figure 4) at cluster FC ( $t(22) = 2.22$ ;  
430  $P = 0.036$ ).

431 **Second time window (250 – 1000 ms): midline electrodes.** The overall ANOVA did not reveal any  
432 significant effect involving factor *Condition*.

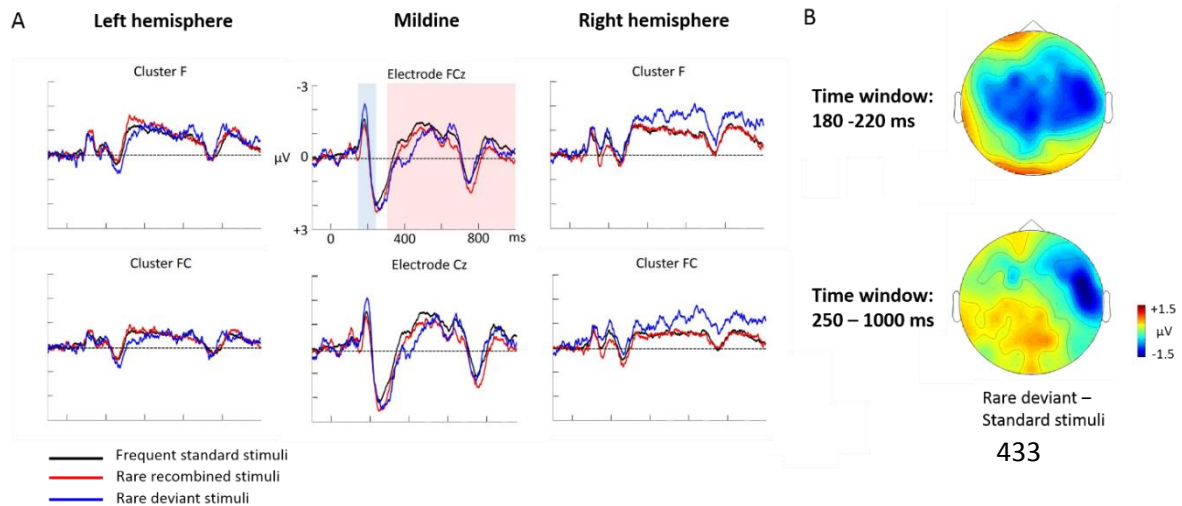

**Figure 4.** Grand average ERPs of Experiment 1b. A) ERPs to the three conditions (frequent standard stimuli, rare recombined stimuli, rare deviant stimuli) are superimposed for the electrode clusters F and FC, and the electrodes FCz and Cz. The analyzed time epochs are marked in blue (180-220 ms) and red (420-1000 ms). B) The topographical distribution of the difference between ‘Standard stimuli’- ‘Rare deviant stimuli’ for the first and second time window.

434

#### 435 **Experiment 2: Behavioral data**

436 As seen in Table 3, participants identified target stimuli with a high accuracy in both experiments.

**Table 3.** Mean ( $\pm$  SEM) of reaction time (in ms), hit rates (in %), misses (in %), and false alarms (in %) to the target stimuli of Experiment 2a and Experiment 2b.

|                      | RT (ms)        | Hits (%)       | Misses (%)      | False alarms (%) |
|----------------------|----------------|----------------|-----------------|------------------|
| <b>Experiment 2a</b> | 391 $\pm$ 17.5 | 99.4 $\pm$ 0.3 | 0.34 $\pm$ 0.18 | 0.63 $\pm$ 0.25  |
| <b>Experiment 2b</b> | 535 $\pm$ 27.5 | 96.6 $\pm$ 1.6 | 3.4 $\pm$ 1.6   | 15.55 $\pm$ 6.95 |

437

438

#### 439 **Experiment 2a: ERP data**

440 Rare deviant stimuli elicited more negative going ERPs compared to standard stimuli (80-190 ms and

441 250-850 ms) while ERPs to standard and rare recombined stimuli did not significantly differ (see Figure

442 5).

443 **First time window (80 – 190 ms): cluster analysis.** The overall ANOVA revealed a significant interaction  
444 between the factors *Condition* and *Cluster* ( $F(10,110) = 2.74; P < 0.001$ ). Follow-up ANOVAS showed a  
445 significant main effect of *Condition* for cluster C ( $F(2,22) = 18.85; P < 0.001$ ) and cluster CP ( $F(2,22) =$   
446  $3.84; P = 0.034$ ). Post-hoc t-tests indicated that ERPs to rare deviant stimuli were significantly more  
447 negative than ERPs to standard stimuli (see Figure 5) at cluster C ( $t(11) = 4.93; P < 0.001$ ).

448 **First time window (80 – 190 ms): midline analysis.** The overall ANOVA revealed a significant  
449 interaction of *Condition*  $\times$  *Electrode* ( $F(12,132) = 3.76; P < 0.001$ ). Follow-up ANOVAS obtained a  
450 significant main effect of *Condition* for electrode FCz ( $F(2,22) = 11.88; P < 0.001$ ), Cz ( $F(2,22) = 15.34; P$   
451  $< 0.001$ ), CPz ( $F(2,22) = 20.44; P < 0.001$ ), Pz ( $F(2,22) = 10.48; P < 0.001$ ). Subsequent t-tests showed  
452 that this main effect was driven by a significant more negative amplitude in response to the rare  
453 deviant stimuli compared to the standard stimuli (see Figure 5) at electrode FCz ( $t(11) = -3.99; P =$   
454  $0.003$ ), Cz ( $t(11) = -4.48; P = 0.001$ ), CPz ( $t(11) = -4.86; P < 0.001$ ), and Pz ( $t(11) = -2.81; P = 0.029$ ).

455 **Second time window (250 – 850 ms): cluster analysis.** The overall ANOVA revealed an interaction  
456 between *Condition*  $\times$  *Cluster* ( $F(10,110) = 3.23; P < 0.001$ ). Follow-up ANOVAS showed a significant main  
457 effect of factor *Condition* for cluster P ( $F(2,22) = 4.9; P = 0.015$ ) and cluster PO ( $F(2,22) = 4.74; P =$   
458  $0.017$ ). Post-hoc t-tests indicated that ERPs in response to rare deviant stimuli were significantly more  
459 negative compared to ERPs to standard stimuli (see Figure 5) at cluster P ( $t(11) = 3.46; P = 0.008$ ) and  
460 cluster PO ( $t(11) = 3.47; P = 0.008$ )

461 **Second time window (250 – 850 ms): midline analysis.** The overall ANOVA revealed a significant  
462 interaction of *Condition*  $\times$  *Electrode* ( $F(12,132) = 3.82; P < 0.001$ ). Sub ANOVAS showed a significant  
463 main effect for the factor *Condition* at electrode Fz ( $F(2,22) = 10.59; P < 0.001$ ), FCz ( $F(2,22) = 8.86; P =$   
464  $0.001$ ), Cz ( $F(2,22) = 4.13; P = 0.027$ ). Subsequent t-tests detected significant differences between the  
465 standard and rare deviant stimuli at electrode Fz ( $t(11) = 5.71; P < 0.001$ ), FCz ( $t(11) = 4.49; P = 0.001$ ),

466 and Cz ( $t(11) = 2.53$ ;  $P = 0.049$ ); ERPs to rare deviants were more negative going than ERPs to standard  
467 stimuli (see Figure 5).

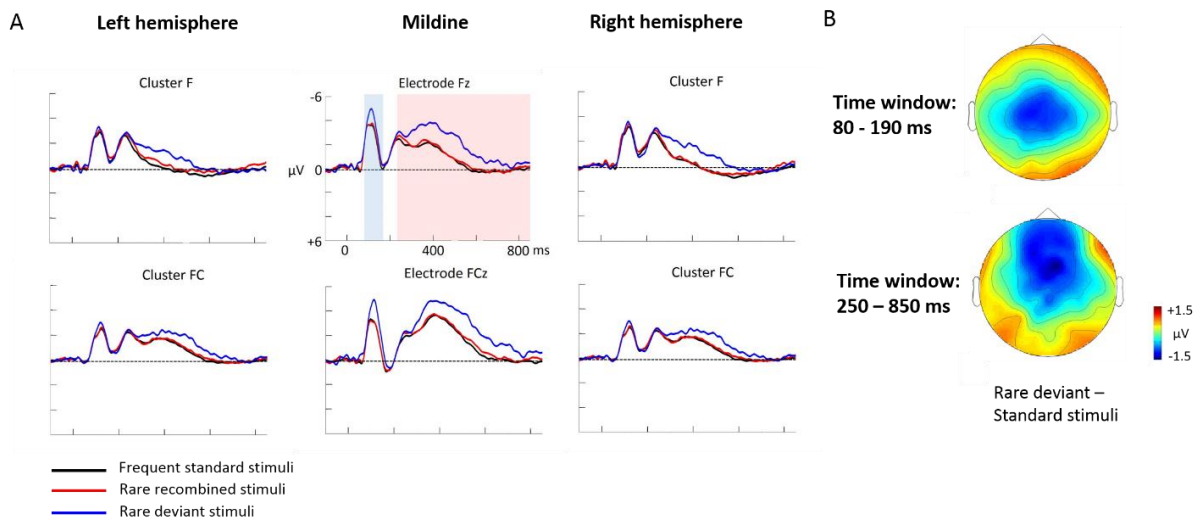

**Figure 5.** Grand average ERPs of Experiment 2a. A) ERPs to the three conditions (frequent standard stimuli, rare recombined stimuli, rare deviant stimuli) are superimposed for the electrode clusters F and FC, and the electrodes Fz and FCz. The analyzed time epochs are marked in blue (80-190 ms) and red (250-850 ms). B) The topographical distribution of the difference between ‘Standard stimuli’- ‘Rare deviant stimuli’ for the first and second time window.

#### 468 **Experiment 2b: ERP data**

469 ERPs to rare deviant stimuli were more negative going than ERPs to standard stimuli (80-160 ms, 170-  
470 230 ms, 250-850 ms). Crucially, ERPs to rare recombined stimuli were more positive going than to  
471 standards (250-850 ms; see Figure 6).

472 **First time window (80 – 160 ms): cluster analysis.** The overall ANOVA revealed a significant  
473 interaction of *Condition* × *Cluster* ( $F(10,110) = 3.82$ ;  $P = 0.044$ ). Further sub-ANOVAs showed a main  
474 effect of *Condition* for cluster C ( $F(2,22) = 5.83$ ;  $P = 0.003$ ) and cluster PO ( $F(2,22) = 4.16$ ;  $P = 0.027$ ),  
475 indicating a significant more negative amplitude in response to rare deviant than to standard stimuli  
476 (see Figure 6) at cluster C ( $t(11) = 4.44$ ;  $P = 0.001$ ) and cluster PO ( $t(11) = 3.19$ ;  $P = 0.014$ ).

477 **First time window (80 – 160 ms): midline analysis.** The overall ANOVA revealed a significant  
478 interaction of *Condition* × *Electrode* ( $F(12,132) = 2.72$ ;  $P = 0.002$ ). Follow-up ANOVAs revealed a

479 significant main effect of *Condition* for electrode FCz ( $F(2,22) = 4.28$ ;  $P = 0.024$ ), Cz ( $F(2,22) = 6.01$ ;  $P =$   
480  $0.007$ ) and CPz ( $F(2,22) = 3.67$ ;  $P = 0.039$ ). Subsequent t-tests indicated that ERPs to rare deviant were  
481 more negative than to standard stimuli (see Figure 6) at electrode FCz ( $t(11) = -2.85$ ;  $P = 0.026$ ), Cz  
482 ( $t(11) = -3.59$ ;  $P = 0.006$ ), and CPz ( $t(11) = -2.59$ ;  $P = 0.044$ ).

483 **Second time window (170 – 230 ms): cluster analysis.** The overall ANOVA did not reveal any significant  
484 effect involving factor *Condition*.

485 **Second time window (170 – 230 ms): midline analysis.** The overall ANOVA showed a significant  
486 interaction of *Condition*  $\times$  *Electrode* ( $F(12,132) = 4.16$ ;  $P = 0.01$ ). Follow-up ANOVAs revealed a main  
487 effect of *Condition* for electrode FCz ( $F(2,22) = 3.44$ ;  $P = 0.047$ ), Cz ( $F(2,22) = 7.17$ ;  $P = 0.003$ ), CPz  
488 ( $F(2,22) = 11.47$ ;  $P < 0.001$ ), and Pz ( $F(2,22) = 20.37$ ;  $P < 0.001$ ). Subsequent t-tests indicated more  
489 positive going ERPs to rare deviant than to standard stimuli (see Figure 6) at electrode FCz ( $t(11) = 3.05$ ;  
490  $P = 0.018$ ), Cz ( $t(11) = 3.74$ ;  $P = 0.005$ ), CPz ( $t(11) = 3.87$ ;  $P = 0.003$ ), and Pz ( $t(11) = 3.7$ ;  $P = 0.005$ ).

491 **Third time window (250 -850 ms): cluster analysis.** The overall ANOVA revealed a significant  
492 interaction of *Condition*  $\times$  *Cluster* ( $F(10,110) = 4.12$ ;  $P < 0.001$ ). Follow-up ANOVAs showed a significant  
493 main effect of *Condition* for cluster F ( $F(2,22) = 5.09$ ;  $P = 0.013$ ), FC ( $F(2,22) = 4.4$ ;  $P = 0.022$ ), CP ( $F(2,22)$   
494  $= 6.42$ ;  $P = 0.005$ ), and PO ( $F(2,22) = 6.35$ ;  $P = 0.005$ ). Subsequent t-tests indicated significant more  
495 positive going ERPs to rare deviant than to standard stimuli (see Figure 6) at cluster F ( $t(11) = 2.77$ ;  $P =$   
496  $0.03$ ), FC ( $t(11) = 3.88$ ;  $P = 0.004$ ), CP ( $t(11) = 2.62$ ;  $P = 0.041$ ), and PO ( $t(11) = 3.6$ ;  $P = 0.01$ ). In addition,  
497 t-tests showed that ERPs to rare recombined standards were more positive going than to standard  
498 stimuli (see Figure 6) at cluster F ( $t(11) = -3.11$ ;  $P = 0.016$ ), CP ( $t(11) = -3.43$ ;  $P = 0.009$ ), and PO ( $t(11) =$   
499  $-3.41$ ;  $P = 0.016$ ).

500 **Third time window (250 -850 ms): midline analysis.** The overall ANOVA revealed a significant  
501 interaction between *Condition*  $\times$  *Electrode* ( $F(12,132) = 7.62$ ;  $P < 0.001$ ). Follow-up ANOVAs showed a  
502 main effect of *Condition* for electrode Fz ( $F(2,22) = 7.42$ ;  $P = 0.003$ ), FCz ( $F(2,22) = 9.24$ ;  $P < 0.001$ ), Cz  
503 ( $F(2,22) = 9.24$ ;  $P < 0.001$ ), Pz ( $F(2,22) = 6.49$ ;  $P = 0.005$ ), POz ( $F(2,22) = 7.92$ ;  $P = 0.002$ ), and Oz ( $F(2,22)$



504 = 5.62;  $P = 0.009$ ). Subsequent t-tests indicated that ERPs to rare deviants were more negative going  
505 than to standard stimuli (see Figure 6) at electrode Fz ( $t(11) = 2.86$ ;  $P = 0.013$ ), FCz ( $t(11) = 3.71$ ;  $P =$   
506  $0.002$ ), Pz ( $t(11) = 3.23$ ;  $P = 0.006$ ), POz ( $t(11) = 2.93$ ;  $P = 0.01$ ), and Oz ( $t(11) = -2.54$ ;  $P = 0.024$ ).  
507 Additionally, t-tests confirmed more positive going ERPs to rare recombined than to standard stimuli  
508 (see Figure 6) at electrode Fz ( $t(11) = -3.54$ ;  $P = 0.01$ ), FCz ( $t(11) = -4.29$ ;  $P = 0.002$ ), Pz ( $t(11) = -3.49$ ;  $P$   
509  $= 0.003$ ), POz ( $t(11) = -3.58$ ;  $P = 0.006$ ), and Oz ( $t(11) = -3.29$ ;  $P = 0.01$ ).

510

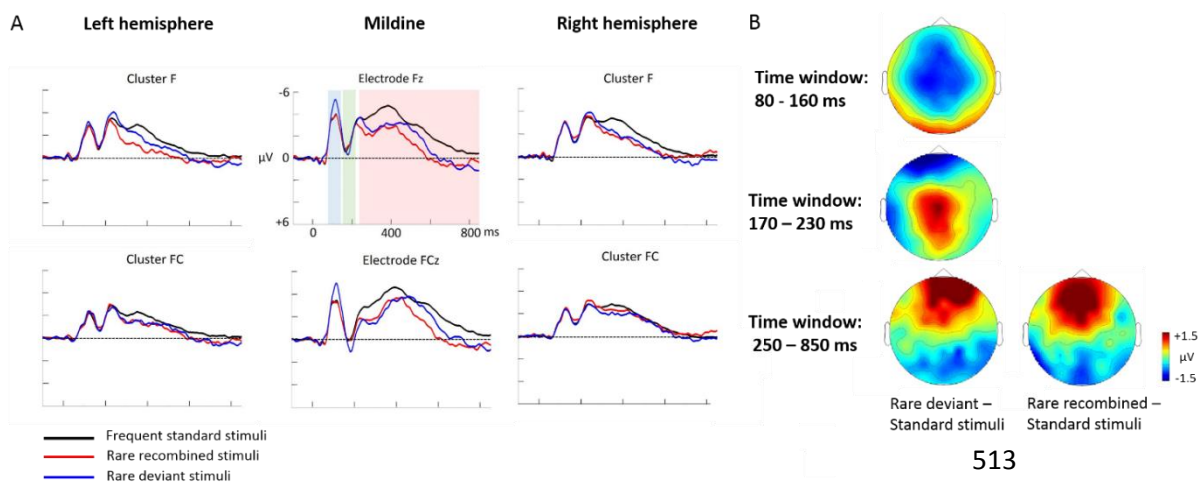

**Figure 6.** Grand average ERPs of Experiment 2b. A) ERPs to the three conditions (frequent standard stimuli, rare recombined stimuli, rare deviant stimuli) are superimposed for the electrode clusters F and FC, and the electrodes Fz and FCz. The analyzed time epochs are marked in blue (80-160 ms), green (170-230 ms) and red (250-850 ms). B) The topographical distribution of the difference between 'Standard stimuli' - 'Rare deviant stimuli' and 'Standard stimuli' - 'Rare recombined stimuli' for the first and second time window.

514

515

516

517

518

519

520

521



## 522 **Discussion**

523 The goal of the present study was to test for a higher sensitivity of infants as compared to adults to  
524 crossmodal statistics and to compare the mechanisms of crossmodal association learning in infants  
525 and adults. We conducted ERP studies in which infants and adults were exposed to audio-visual  
526 stimulus combinations with different probabilities. ERPs to standard crossmodal combinations with a  
527 high frequency and to rare recombinations of these standards were compared. While infants passively  
528 learned the crossmodal combinations, adults discriminated recombined from standard combinations  
529 only when they were task relevant. In contrast, all groups succeeded in differentiating high frequent  
530 standard stimuli from rare audio-visual stimuli, which comprised infrequent auditory and visual  
531 elements.

532 Studies using artificial languages or visual artificial scenes have repeatedly demonstrated that  
533 infants develop a sensitivity to the likelihood of events as well as to conditional probabilities (Krogh et  
534 al., 2013; Aslin, 2014). Two recent studies found that six-month and twelve-month-old infants were  
535 able to learn to predict a visual stimulus based on a co-occurring or preceding auditory stimulus  
536 (Emberson et al., 2011; Kouider et al., 2015). While Kouider et al. (2015) demonstrated that infants at  
537 the age of twelve months were able to learn an association between an arbitrary sound and a visual  
538 object category (faces vs. flowers), they did not include an adult control group to demonstrate  
539 differences in learning between adults and infants, nor were they able to distinguish processes related  
540 to the detection of crossmodal combinations and the familiarity with certain sensory elements.

541 Thus, the present study extended previous research by showing that the probabilities of crossmodal  
542 combinations were extracted by infants as young as six months after a short exposure period while  
543 adults failed to learn crossmodal statistics under this condition. It is important to notice that we  
544 controlled for the likelihood of the auditory and visual elements of the employed crossmodal stimuli  
545 by recombining the auditory and visual elements of the frequent standard combinations. We provide  
546 ERP evidence demonstrating that the processing of crossmodal combinations and the processing of  
547 the likelihood of sensory elements can be dissociated: in infants, rare recombined stimuli elicited a left

548 negative potential starting at about 420 ms post-stimulus while rare deviant stimuli elicited right  
549 lateralized positivity starting at 200 ms post-stimulus (Experiment 1a). Adults tested under identical  
550 conditions were only able to distinguish between rare deviant and standard stimuli (Experiment 1b,  
551 ERP effect starting 180 ms post-stimulus) but not between standard and rare recombined stimuli.  
552 These results demonstrate that infants were able to learn arbitrary crossmodal associations as early as  
553 six months of age and thus much earlier than suggested by the study of Kouider et al. (2015). Moreover,  
554 we provide first evidence that the learning of crossmodal statistics at this age is particularly sensitive  
555 and superior to adults. It could be argued that the signal to noise ratio of the ERPs in adults was not  
556 sufficient to demonstrate crossmodal learning in this group. However, two findings render this account  
557 for the present results unlikely: first, adults showed a significant deviant effect for rare deviant  
558 compared to standard stimuli. Second, in Experiment 2a, an ERP difference between standard and rare  
559 recombined stimuli was not significant either despite a much higher signal to noise ratio in comparison  
560 to Experiment 1b.

561 Our results provide evidence that crossmodal statistical relations are better implicitly learned in the  
562 developing than in the adult system. An enhanced sensitivity for low-level statistical patterns during  
563 development had been reported by other studies as well. For example, Janacsek et al. (2012) and  
564 Nemeth et al. (2013) demonstrated that children are superior in implicit statistical learning of  
565 sequences compared to adults but later lose this advantage and become more reliant on explicit  
566 learning. A similar developmental time course was found in a study of Jost et al. (2011), investigating  
567 the neurophysiological correlates of visual statistical learning in children and adults: children showed  
568 learning related ERP effects earlier during the acquisition phase indicating that they acquired the  
569 statistical structure quicker than the adult group. It is important to take into account that not all studies  
570 investigating statistical learning during development found enhanced learning performance in infants  
571 or children. For example, Saffran et al. (1996, 1999) reported similar abilities in eight-month-old infants  
572 and adults in the extraction of the underlying statistical structure of auditory sequences. Other studies  
573 observed better learning for older children and young adults than in younger age groups (Mayberry et

574 al., 1995; Fletcher et al., 200; Kirkham et al., 2007). At first glance, these findings seem to be at odds  
575 with the present results. However, these inconsistent findings can be related to the complexity of the  
576 statistical patterns. Indeed, several studies have revealed that the ability to extract statistical patterns  
577 from sensory input during infancy improves from the simple tracking of event probabilities early in the  
578 development (from three months onwards, see Fantz et al., 1964) to the learning of more complex and  
579 higher-level statistical patterns at a later developmental stage (from twelve months onwards, see  
580 Gómez & Maye, 2005).

581 In addition to the enhanced sensitivity for crossmodal statistics in infants, our findings strongly  
582 suggest that learning mechanisms change from early development to adulthood. Adults did not learn  
583 crossmodal combinations implicitly as infants did, but succeeded when special crossmodal  
584 combinations were task relevant. Animal studies have suggested that during the sensitive phase,  
585 neural networks are set up in response to an exposure to the environment while during later  
586 development and in adulthood learning is context-specific and depends on task relevance (e.g. reward)  
587 and instructions (Keuroghlian & Knudsen, 2007). Currently, we can only speculate about the neural  
588 underpinnings of this age-dependent neuroplasticity. As noted by Dehaene-Lambertz & Spelke (2015)  
589 feedforward connectivity seems to be to a larger degree genetically determined than feedback  
590 connectivity and the latter seems to be mostly experience dependent. Changes in physical stimulus  
591 properties (in our study represented by rare deviant stimuli) can be detected to a larger extent based  
592 on feedforward connectivity and seems to work independent of task context both in infants and adults.  
593 This is in accordance with our results that infants as well as adults were able to differentiate the  
594 standard and rare deviant stimuli at an early processing stage. In contrast, the detection of rare  
595 recombined stimuli was associated with a longer latency ERP effect in both infants and adults. Indeed,  
596 multisensory binding has been found to rely on later processing stages in adults (Bruns & Röder, 2010a;  
597 Bonath et al., 2007). Emberson et al. (2011) provided evidence that crossmodal connectivity is at least  
598 partially in place at the age of six months. Here we speculate that this initial crossmodal connectivity  
599 might even be more extensive in the developing brain (see Johannsen & Röder, 2014) and thus might

600 be the neural underpinning of the enhanced sensitivity to crossmodal statistics in development. We  
601 further assume in line with the “multisensory perceptual narrowing” idea (Lewkowicz & Ghazanfar,  
602 2006) that experience narrows down the initial crossmodal connectivity and elaborates the  
603 connections which are useful for an individual (Johannsen & Röder, 2014; Lewkowicz, 2014). With an  
604 improved tuning of neural networks the learning mode changes towards a larger context dependency  
605 to guarantee the small adaptations necessary throughout life. Moreover, as some parts of the neural  
606 networks seem to stabilize, learning partially shifts to different neural sites. For example, while prism  
607 wearing during the sensitive phase changes the connectivity between the central (ICC) and external  
608 (ICX) inferior colliculus of the midbrain of barn owls, adaptation to prisms later in the critical period is  
609 mediated by a reorganization of the optical tectum to which the ICX projects (Knudsen, 2002). In the  
610 present study we found that the learning of crossmodal combinations in adults depends on task  
611 relevance (Experiment 2b). Thus, in accordance with Keuroghlian and Knudsen (Keuroghlian &  
612 Knudsen, 2007) and Bavelier et al. (2010), neuroplasticity in adults depends to a larger extent on task  
613 relevance and attention. Task relevance or attention constitute specific top-down influences on  
614 sensory representations and are thus mediated via feedback connections that were are well tuned and  
615 elaborated during development (Dehaene-Lambertz & Spelke, 2015).

616 Since we argue that the change in learning mode during development is related to functional  
617 specialization, the strong lateralization of both ERP effects in infants seems rather surprising. The  
618 differentiation of standard and rare recombined stimuli requires the detection of conditional  
619 probabilities. This ability has been postulated as a precursor of language learning. Indeed, it has been  
620 shown with structural imaging techniques that many hemispheric asymmetries, in particular those  
621 related to the language system (Friederici, 2009) exist at birth or shortly thereafter (see Dehaene-  
622 Lambertz & Spelke, 2015). Thus, we speculate that the strong left lateralized ERP difference between  
623 standard and rare recombined stimuli might reflect a recruitment of similar neural circuits that have  
624 been proposed to enable the detection of word boundaries (Saffran, 1996), non-adjacent transitional  
625 probabilities and possibly syntactical rules (Friederici, 2002; Friederici et al., 2006). Thus, this neural

626 system might, partially independently of modality and domain, allow for detecting statistical relations  
627 (Kuhl, 2010; Aslin & Newport, 2014). The right lateralized ERP effect to rare deviant stimuli was not  
628 unique to the infant group, but was as well observed in the adults tested with the same passive design  
629 (Experiment 1b). Interestingly such a lateralization was neither found for Experiment 2a nor for  
630 Experiment 2b, in which the adult participants were actively engaged in a task. We speculate that rare  
631 deviants elicited a reflexive and exogenous attention shift to the rare sensory features. Such reflexive  
632 spatial attention orienting has often been associated with right parietal brain regions (Okada et al.,  
633 2008; Mort et al., 2003; Chica et al., 2011). In contrast, in Experiment 2a and 2b, participants had to  
634 allocate attention to a certain stimulus or stimulus combination and to avoid exogenous attention  
635 shifts.

636 In conclusion our study demonstrates that six-month old infants were able to quickly learn  
637 crossmodal statistics through a mere passive exposure, whereas adults learned the same crossmodal  
638 combinations only when they were task relevant. Thus, we provide first evidence for a higher  
639 sensitivity for crossmodal statistics in infants compared to adults, indicating age-dependent  
640 mechanisms for the learning of arbitrary crossmodal combinations. We speculate that initial passive  
641 association learning allows infants to quickly form first internal models of their sensory environment.  
642 In adulthood these internal models are adjusted if task relevant.

643

644

645

646

647

648

649

650

651

652 **Acknowledgments**

653 This work was supported by the European Research Council (ERC-2009-AdG 249425  
654 CriticalBrainChanges) and grant “Crossmodal Learning” of the City of Hamburg. We thank Rebecca  
655 Nixdorf for help with data acquisition and Erich Schröger for his comments and suggestions. We are  
656 particularly grateful to the parents and their children for taking part.

657

658 **Author contributions**

659 All authors contributed to the design of the study; B.H., M.v.F., and S.R. collected the data; B.R., B.H.  
660 and S.R. analyzed the data; B.R. and S.R. wrote the manuscript; all authors checked and approved the  
661 final manuscript.

662

663 **Competing interests**

664 The authors declare no competing financial interests.

665

666

667

668

669

670

671

672

673

674

675

676

677

## 678 References

- 679 1. Aslin, R. N. (2014). Infant learning: Historical, conceptual, and methodological challenges. *Infancy: the Official Journal of the International Society on Infant Studies*, 19, 2-27, DOI: 10.1111/inf.12036.
- 680
- 681
- 682 2. Aslin, R. N. & Newport, E. L. (2014). Distributional Language Learning: Mechanisms and Models of Category Formation, *Language Learning*, 64, 86-105, DOI: 10.1111/lang.12074.
- 683
- 684 3. Bahrnick, L. E. & Lickliter, R. (2000). Intersensory redundancy guides attentional selectivity and perceptual learning in infancy. *Developmental Psychology*, 36, 190-201, DOI: 10.1037//0012-1649.36.2.190.
- 685
- 686
- 687 4. Bahrnick, L. E., Lickliter, R., & Flom, R. (2004). Intersensory redundancy guides the development of selective attention, perception, and cognition in infancy. *Current Directions in Psychological Science*, 13, 99-102, DOI: 10.1111/j.0963-7214.2004.00283.x.
- 688
- 689
- 690 5. Bahrnick, L. E., Hernandez-Reif, M., & Flom, R. (2005). The development of infant learning about specific face-voice relations. *Developmental Psychology*, 41, 541-552, DOI: 10.1037/0012-1649.41.3.541.
- 691
- 692
- 693 6. Bavelier, D., Levi, D. M., Li, R. W., Dan, Y., & Hensch, T. K. (2010). Removing brakes on adult brain plasticity: from molecular to behavioral interventions. *Journal of Neuroscience*, 30, 14964-14971, DOI:10.1523/JNEUROSCI.4812-10.2010.
- 694
- 695
- 696 7. Bonath, B., Noesselt, T., Martinez, A., Mishra, J., Schwiecker, K., Heinze, H. J., Hilliard, S. A. (2007). Neural basis of the ventriloquist illusion. *Current Biology*, 17, 1697-1703, DOI: 10.1016/j.cub.2007.08.050.
- 697
- 698
- 699 8. Brookes, H., Slater, A., Quinn, P. C., Lewkowicz, D. J., Hayes, R., & Brown, E. (2001). Three-month-old infants learn arbitrary auditory-visual pairings between voices and faces. *Infant and Child Development*, 10, 75-82.
- 700
- 701
- 702 9. Bruns P., Röder B. (2010a). Tactile capture of auditory localization: An event-related potential study. *European Journal of Neuroscience*, 31, 1844–1857, DOI: 10.1111/j.1460-9568.2010.07232.x.
- 703
- 704 10. Bulf, H., Johnson, S. P., & Valenza, E. (2011). Visual statistical learning in the newborn infant. *Cognition*, 121, 127-132, DOI:10.1016/j.cognition.2011.06.010.
- 705
- 706 11. Chica A. B., Bartolomeo P., Valero-Cabre A. (2011). Dorsal and ventral parietal contributions to spatial orienting in the human brain. *Journal of Neuroscience*, 31, 8143–8149, DOI: 10.1523/JNEUROSCI.5463-10.2010.
- 707
- 708
- 709 12. DeBoer, T., Scott, L. S., Nelson, C. A. (2007). Methods for acquiring and analyzing infant event-related potentials. In: DeHaan, M. (Ed.), *Infant EEG and Event-Related Potentials*, pp. 5–38. Psychology Press, New York.
- 710
- 711
- 712 13. Dehaene-Lambertz, G. & Spelke, E. S. (2015). The Infancy of the Human Brain. *Neuron*, 88, 93-109, DOI: 10.1016/j.neuron.2015.09.026 .
- 713
- 714 14. de Villers-Sidani, E., Chang, E. F., Bao, S., Merzenich, M. M. (2007). Critical period window for spectral tuning defined in the primary auditory cortex (A1) in the rat. *Journal of Neuroscience*, 27, 180–189, DOI: 10.1523/JNEUROSCI.3227-06.2007.
- 715
- 716
- 717 15. Emberson, L. L., Conway, C. M., & Christiansen, M. H. (2011). Timing is everything: changes in presentation rate have opposite effects on auditory and visual implicit statistical learning. *Journal of Experimental Psychology*, 64, 1021–1040, DOI: 10.1080/17470218.2010.538972.
- 718
- 719
- 720 16. Fantz, R. L. (1964). Visual experience in infants: Decreased attention to familiar patterns relative to novel ones. *Science*, 146, 668-670.
- 721
- 722 17. Fiser, J., Aslin, R. (2002b). Statistical learning of new visual feature combinations by infants. *Proceedings of the National Academy of Sciences of the United States of America*, 99, 15822 – 15826, DOI: 10.1073/pnas.232472899.
- 723
- 724



- 725 **18.** Fiser, J., Berkes, P., Orbán, G., & Lengyel, M. (2010). Statistically optimal perception and learning:  
726 from behavior to neural representation. *Trends in Cognitive Sciences*, 12, 119 – 130,  
727 DOI: 10.1016/j.tics.2010.01.003.
- 728 **19.** Fletcher, J., Mayberry, M. T., & Bennet, S. (2000). Implicit learning differences: a question of  
729 developmental level?. *Journal of Experimental Psychology: Learning, Memory, and Cognition*,  
730 26(1), 246-252, DOI: 10.1037/0278-7393.26.1.246.
- 731 **20.** Frank, M. C., Slemmer, J. A., Marcus, G. F., & Johnson, S. P. (2009). Information from multiple  
732 modalities helps five-months-olds learn abstract rules. *Developmental Science*, 12, 504-509,  
733 DOI: 10.1111/j.1467-7687.2008.00794.x.
- 734 **21.** Friederici, A. D. (2002). Towards a neural basis of auditory sentence processing. *Trends in Cognitive*  
735 *Sciences*, 6(2), 78-84, DOI: 10.1016/S1364-6613(00)01839-8.
- 736 **22.** Friederici, A. D., Bahlmann, J., Heim, S., Schubotz, R.I., & Anwander, A. (2006). The brain  
737 differentiates human and non-human grammars: Functional localization and structural  
738 connectivity. *Proceedings of the National Academy of Sciences of the United States of America*,  
739 103(7), 2458-2463, DOI:10.1073/pnas.0509389103.
- 740 **23.** Friederici, A. S. (2009). Pathways to language: fiber tracts in the human brain. *Trends in Cognitive*  
741 *Sciences*, 13(4), 175-81. DOI: 10.1016/j.tics.2009.01.001.
- 742 **24.** Gómez, R. L. & Maye, R. (2005). The developmental trajectory of nonadjacent dependency  
743 learning, *Infancy*, 7, 183-206, DOI: 10.1002/wcs.1244.
- 744 **25.** Janacsek, K., Fiser, J., Nemeth, D. (2012). The best time to acquire new skills: age-related  
745 differences in implicit skill learning across the human life span. *Developmental Science*, 15, 496-  
746 505, DOI: 10.1111/j.1467-7687.2012.01150.x.
- 747 **26.** Johannsen, J. & Röder, B. (2014). Uni- and crossmodal refractory period effects of event-related  
748 potentials provide insights into the development of multisensory processing. *Frontiers in Human*  
749 *Neuroscience*, 8:552, DOI:10.3389/fnhum.2014.00552.
- 750 **27.** Jost, E., Conway, C. M., Purdy, J. D., & Hendricks, M. A. (2011). Neurophysiological correlates of  
751 visual statistical learning in adults and children. *Paper Presented at the 33rd Annual meeting of the*  
752 *Cognitive Science Society, July 2011, Boston.*
- 753 **28.** Keuroghlian, A. S. , Knudsen, E. I . (2007). Adaptive auditory plasticity in developing and adult  
754 animals. *Progress in Neurobiology*, 82(3), 109-121, DOI:10.1016/j.pneurobio.2007.03.005.
- 755 **29.** Kirkham, N. Z., Slemmer, J. A., & Johnson, S. P. (2002). Visual statistical learning in infancy: Evidence  
756 for a domain general mechanism. *Cognition*, 83(3), 35-42, DOI: 10.1016/S0010-0277(02)00004-5
- 757 **30.** Kirkham, N., Slemmer, J., Richardson, D., Johnson, S. (2007). Location, location, location:  
758 development of spatio-temporal sequence learning in infancy. *Child development*, 78(5), 1559-  
759 1571, DOI:10.1111/j.1467-8624.2007.01083.x.
- 760 **31.** Knudsen, E. (2002). Instructed learning in the auditory localization pathway of the barn owl.  
761 *Nature*, 417, 292-315, DOI: 10.1038/417322a.
- 762 **32.** Kouider, S., Long, B., Le Stanc, L., Charron, S., Fievet, A. C., Barbosa, L. S., Gelskov, S. V. (2015).  
763 Neural dynamics of prediction and surprise in infants, *Nature Communication*, 6:8537, DOI:  
764 10.1038/ncomms9537.
- 765 **33.** Krogh, L., Vlach, H.A., & Johnson, S.P. (2013). Statistical learning across development: flexible yet  
766 constrained. *Frontiers in Psychology*, 5:598, doi: 10.3389/fpsyg.2012.00598.
- 767 **34.** Kuhl, P. (2010). Brain Mechanisms in Early Language Acquisition. *Neuron*, 67(5), 713-727,  
768 doi: 10.1016/j.neuron.2010.08.038.
- 769 **35.** Lany, J., & Saffran, J. R. (2013). Statistical learning mechanisms in infancy. In Rubenstein, J. L. R. &  
770 Rakic, P. (eds.) *Comprehensive Developmental Neuroscience: Neural Circuit Development and*  
771 *Function in the Brain*, Volume 3, pp. 231-248. Amsterdam: Elsevier.



- 772 **36.** Lewkowicz, D. J. (1992). Infants' responsiveness to the auditory and visual attributes of a  
773 sounding/moving stimulus. *Perception & Psychophysics*, 52, 519-528.
- 774 **37.** Lewkowicz, D. J. & Kraebel, K. S. (2004). *The value of multisensory redundancy in the development*  
775 *of intersensory perception*. In E. S. Calvert, G. A., Spence, C., Stein, B. E. The handbook of  
776 multisensory processes, 655-678. Cambridge: MIT.
- 777 **38.** Lewkowicz, D. J. & Ghazanfar, A. A. (2006). The decline of cross-species intersensory perception in  
778 human infants. *PNAS* 103(17), 6771-6774, DOI: 10.1016/j.brainres.2008.03.084.
- 779 **39.** Lewkowicz, D. J. (2014). Early Experience & Multisensory Perceptual Narrowing. *Developmental*  
780 *Psychobiology*, 56(2), 292-315, DOI: 10.1002/dev.21197.
- 781 **40.** Maybery, M., Taylor, M., & O'Brien-Malone, A. (1995). Implicit Learning: sensitive to age but not  
782 IQ. *Australian Journal of Psychology*, 47(1), 8-17.
- 783 **41.** Miller, J. O. (1982). Divided attention: Evidence for coactivation with redundant signals. *Cognitive*  
784 *Psychology*, 14, 247-279, DOI: 10.1016/0010-0285(82)90010-X.
- 785 **42.** Mort D. J., Malhotra P., Mannan S. K., Rorden C., Pambakian A., Kennard C., Husain M. (2003). The  
786 anatomy of visual neglect. *Brain*, 126, 1986-1997, DOI:10.1093/brain/awg200.
- 787 **43.** Neil, P. A., Chee-Ruiter, C., Scheier, C., Lewkowicz, D. J. & Shimojo, S. (2006). Development of  
788 multisensory spatial integration and perception in humans. *Developmental Science*, 9(5), 454-464,  
789 DOI:10.1111/j.1467-7687.2006.00512.x.
- 790 **44.** Nemeth, D., Janacsek, K. & Fiser, J. (2013). Age-dependent and coordinated shift in performance  
791 between implicit and explicit skill learning. *Frontiers in Computational Neuroscience*, 7, 147,  
792 DOI: 10.3389/fncom.2013.00147.
- 793 **45.** Okada, T., Sato, W., Kubota, Y., Usui, K., Inoue, Y., Murai, T., Hayashi, T. & Toichi, M. (2008).  
794 Involvement of medial temporal structures in reflexive attentional shift by gaze. *Social Cognitive &*  
795 *Affective Neuroscience*, 3(1), 80-88, DOI: 10.1093/scan/nsm027.
- 796 **46.** Picton T. W., Bentin S., Berg P., Donchin E., Hillyard S. A., Johnson R., Miller, G. A., Ritter, W.,  
797 Ruchkin, D. S., Rugg, M. D. & Taylor, M. J. (2000). Guidelines for using human event-related  
798 potentials to study cognition: recording standards and publication criteria. *Psychophysiology*, 37,  
799 127-152.
- 800 **47.** Riedel, B. & Burton, A. M. (2006). Auditory sequence learning: differential sensitivity to task  
801 relevant and task irrelevant sequences. *Psychological Research*, 70(5), 337-344, DOI:  
802 10.1007/s00426-005-0226-9.
- 803 **48.** Saffran, J. R., Aslin, R. N., & Newport, E. L. (1996). Statistical learning by 8-month-old infants.  
804 *Science*, 274, 1926-1928. DOI: 10.1126/science.274.5294.1926.
- 805 **49.** Saffran, J. R., Johnson, E. K., Aslin, R. N., & Newport, E. L. (1999). Statistical learning of tone  
806 sequences by human infants and adults. *Cognition*, 70(1), 27-52, DOI: 10.1016/S0010-  
807 0277(98)00075-4.
- 808 **50.** Scheier, C., Lewkowicz, D. & Shimojo, S. (2003). Sound induces perceptual reorganization of an  
809 ambiguous motion display in human infants. *Developmental Science*, 6, 233-244, DOI:  
810 10.1111/1467-7687.00276.
- 811 **51.** Turk-Browne, N. B., Jungé, J., Scholl, B. J. (2005). The automaticity of visual statistical learning.  
812 *Journal of Experimental Psychology: General*, 134(4), 552-64, DOI: 10.1037/0096-3445.134.4.552.
